# Supplementary material for: Folate-Targeted mRNA Delivery Using Chitosan-Functionalized Selenium Nanoparticles: Potential in Cancer Immunotherapy
Source: MDPI journal article supplement (doi:10.3390/ph12040164), 2019-11-04
Supplement: s1 [file s1]

# Supplementary Material

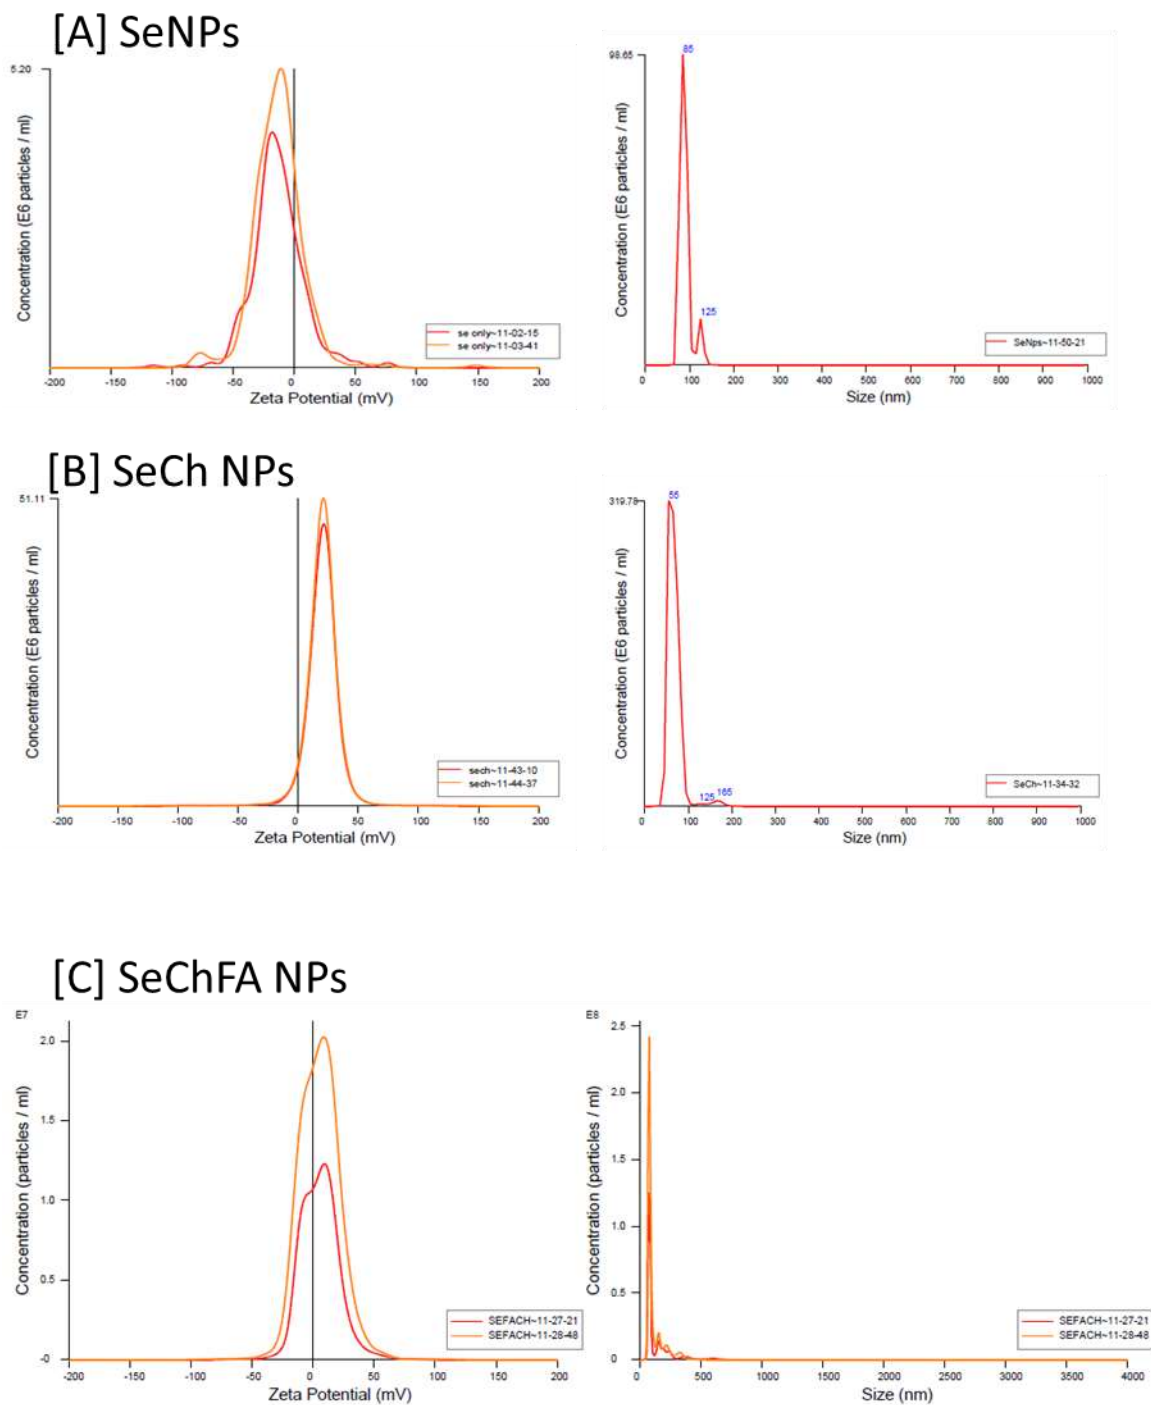

Figure S1. NTA profiles of (A) SeNPs, (B) SeCh NPs and (C) SeChFA NPs.

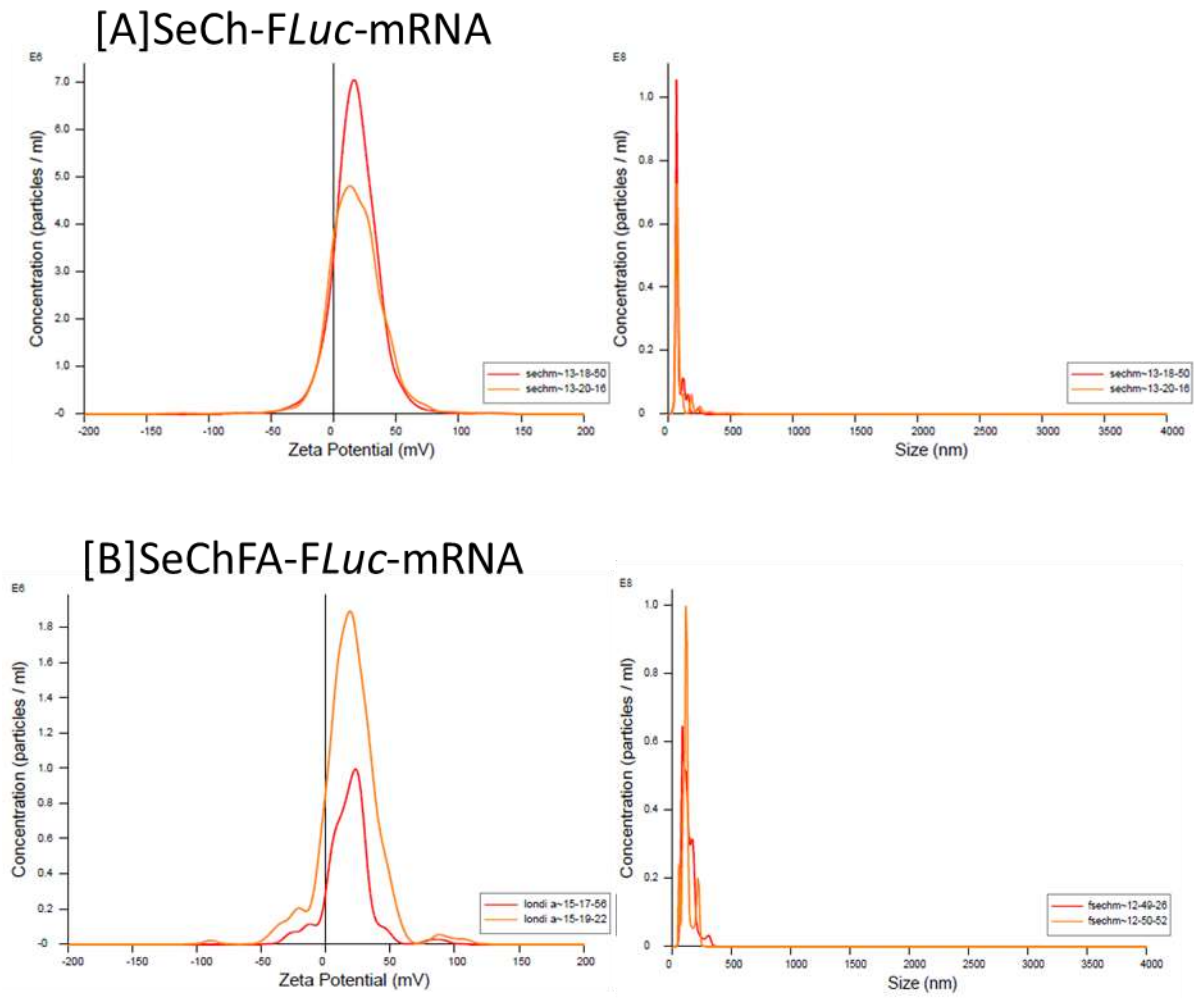

Figure S2. NTA profiles of (A) SeCh and (B) SeChFA: *FLuc*-mRNA nanocomplexes.

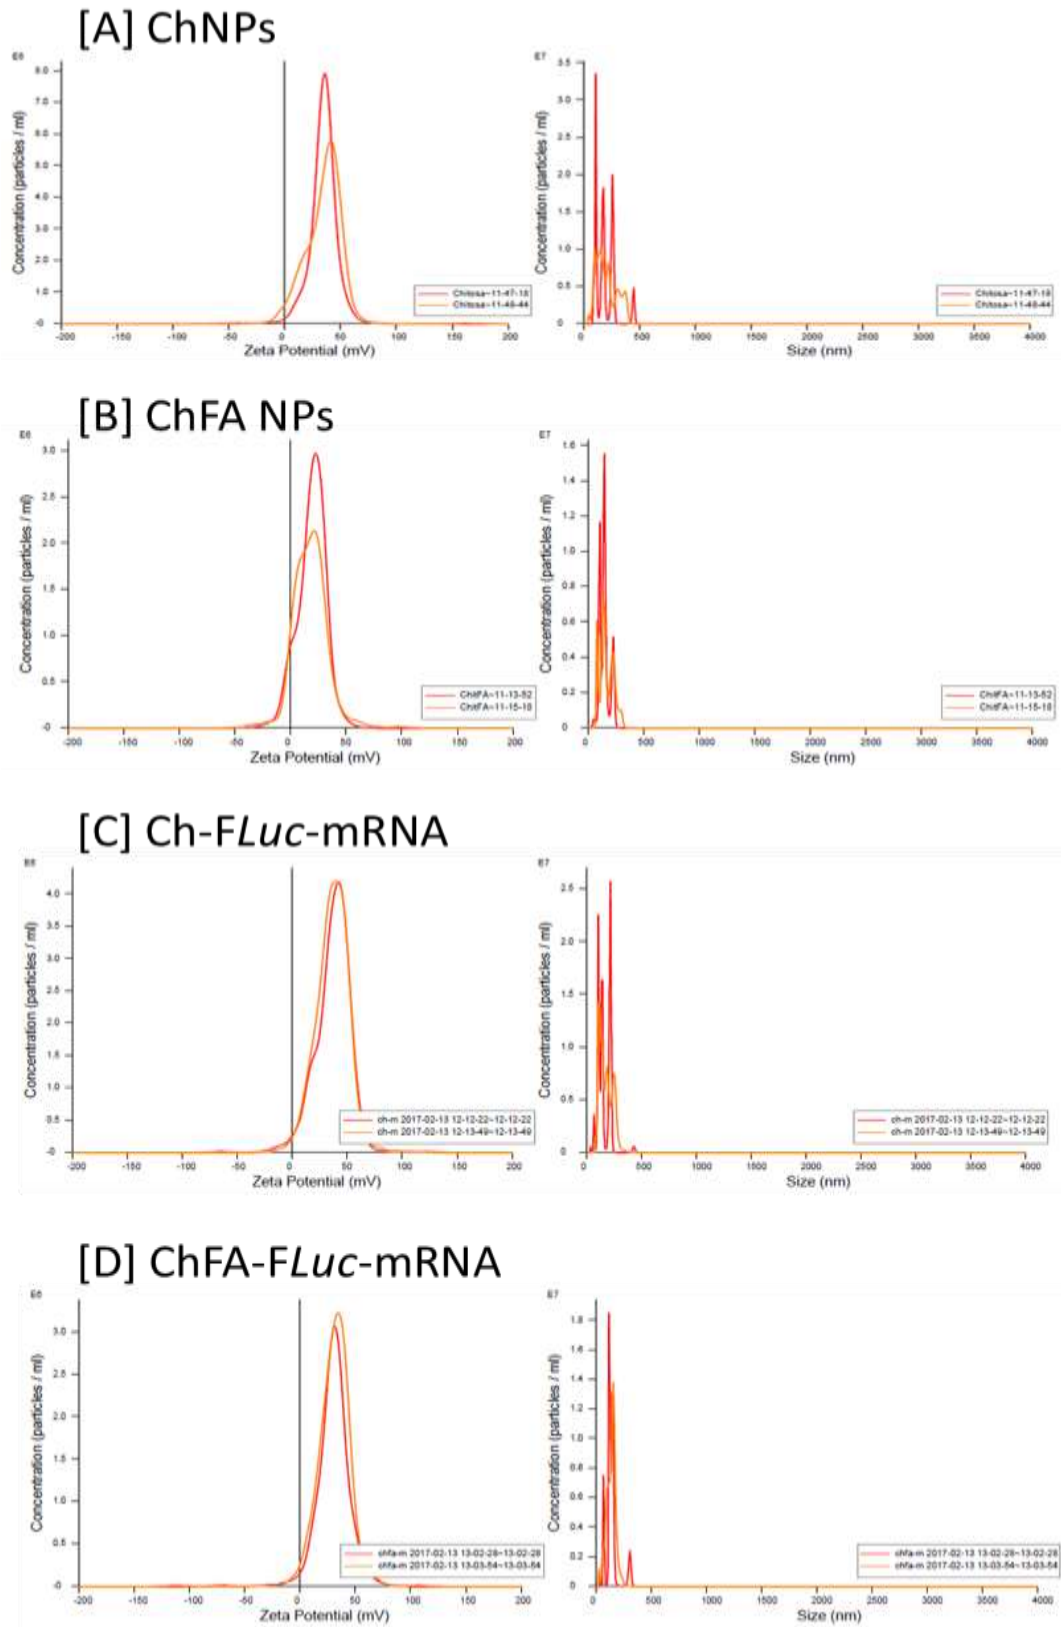

Figure S3. NTA profiles of (A) Ch, (B) ChFA, (C) Ch: *FLuc*-mRNA and (D) ChFA: *FLuc*-mRNA.

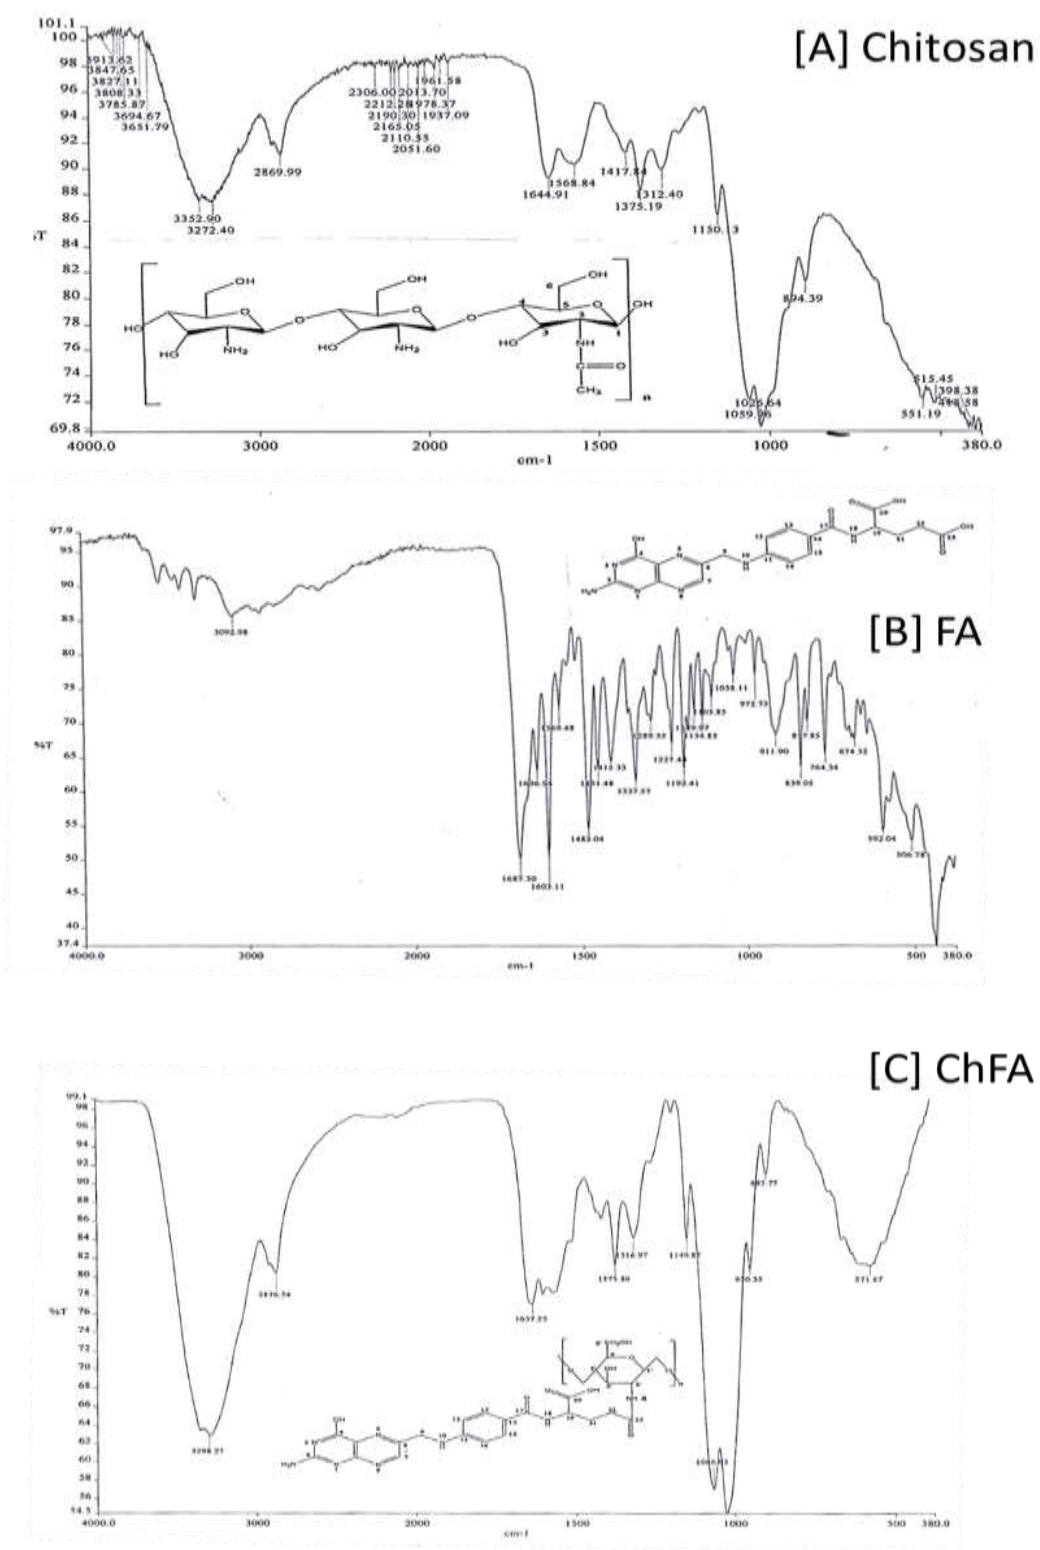

Figure S4: FTIR of (A) Chitosan, (B) Folic acid and (C) Chitosan-Folic acid.

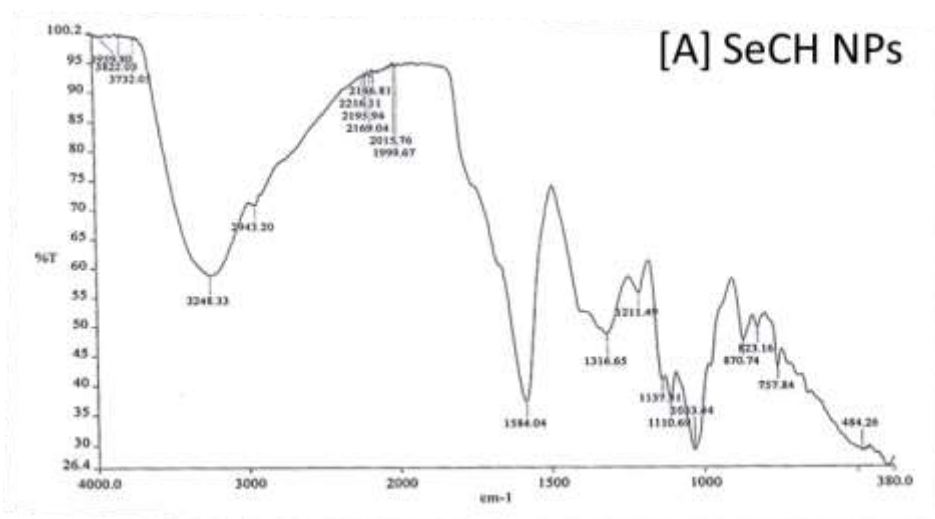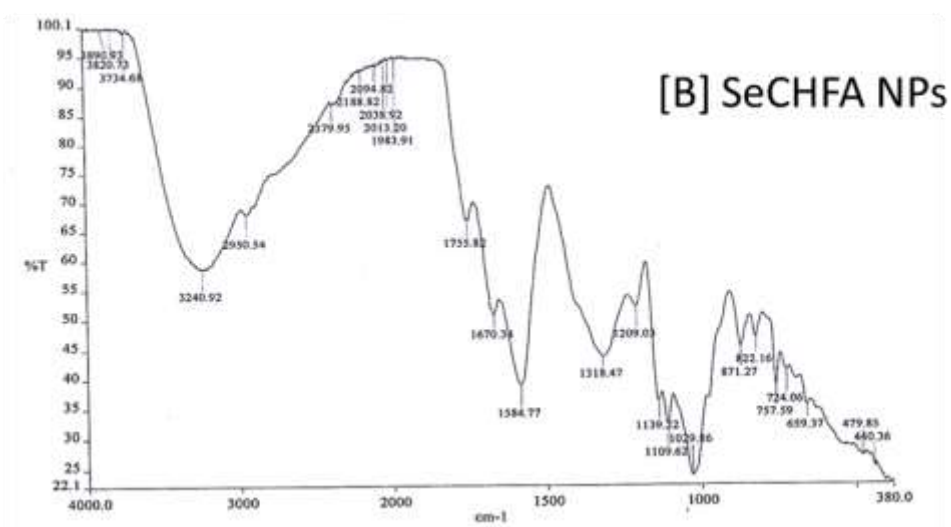

Figure S5: FTIR of (A) SeCh NPs and (B) SeChFA NPs.
